# Supplementary material for: DNA ADP-Ribosylation Stalls Replication and Is Reversed by RecF-Mediated Homologous Recombination and Nucleotide Excision Repair
Source: PubMed Central journal article supplement (PMC7003065; doi:10.1016/j.celrep.2020.01.014), 2019-02-04
Supplement: mmc1.pdf [file mmc1.pdf]

**Cell Reports, Volume 30**

**Supplemental Information**

**DNA ADP-Ribosylation Stalls Replication  
and Is Reversed by RecF-Mediated Homologous  
Recombination and Nucleotide Excision Repair**

**Emeline Lawarée, Gytis Jankevicius, Charles Cooper, Ivan Ahel, Stephan Uphoff, and Christoph M. Tang**

**A**

**DarT**

```

EPEC:  YDYSASLNPKALIWRIVHRDNIPIWLDNGLHCGNSLVQAEINININPELIGKRAGHPVE
      . | . | . | . | . | . | . | . | . | . | . | . | . | . | . | . | . |
T. aquaticus: MPQOGLAYFPVTLIYHITHLNNLQGIQRGGLLPYS-QRPPTQQNVAYGHIQAHRAQVVVE

EPEC:  VGTGGTLHDVVFYFFTFPSPMLMNIHSGRGGIKRRPNEEIIVLVSNLRNVAAHDVFPVFTD
      | | | | | | | | | | | | | | | | | | | | | | | | | | | | | | | | | |
T. aquaticus: VGRGKLDHVVFYFCPRSPMLYAIHTQTDY-QGDQRPLHLVSSAQKVAEARIPFVFTD

EPEC:  SHAYNWNYYTSLNSLDQIDWPILQARFRDPPDPAKFEFYQAALIWQHCPISLLDGI
      | | . . . | . | . | . | . | . | . | . | . | . | . | . | . | . | . |
T. aquaticus: RHARVQYVCFHKLKALDWQAIOA-SYWA---N--VREKKQAEFLVKDFFPWLVEEI

EPEC:  ICYSEEVRLQLEQWL--FQRNLTMSVHTRSGWYFS
      . . | | | | . | . | . | . | . | . |
T. aquaticus: GVVDKTIQAQVESILAQFPDLHHPFVRBRSSWYK
  
```

**DarG**

```

EPEC:  MEALVNTVNTVGMKGIALMFKERFENMKVYALACKQKQVITGKMFITETGELMSPRWI
      . | | | | | | | | | | | | | | | | | | | | | | | | | | | | | | | |
T. aquaticus: VEALVNTVNTVGMKGVVALQFKRAFPPNYQAVYKACERGOVQIGRIFFVYDRGPLAQPRYI

EPEC:  VNFPTKQHWRRDRSMEWIEDGLQDRRFLIEENVQSIAPPLGAGNGGLNWPVRAQIESA
      | | | | | | | | | | | | | | | | | | | | | | | | | | | | | | | |
T. aquaticus: FNFPTKQHWRRHPSMEYVEEGLKDLVCRIQELRVRSIALPPLGAGNGGLNWPVEVKQRIQEA

EPEC:  LGDLQDQVDILIQPTE--KYQNVAKSTGVKRLTPARAATAELVRRYVWVLMGECSLLEIQKL
      | | . . . | . | . | . | . | . | . | . | . | . | . | . | . | . |
T. aquaticus: LEALEGVEVWVYFVENVPKAHSIVPLKTKPRLTPARAALLKFLGYLALGEPGLRLEAQKL

EPEC:  AMLLQRAIEHQDQDDILKLRFEAHYIGPYAPNLNHLNLDGTYLKAERKIPDSQPLDVIW
      | | | | | | | | | | | | | | | | | | | | | | | | | | | | | | | |
T. aquaticus: AYFLQEA-----GLD-LKLDLFAKQKFGPYAEPLNHVLARLEGHYIQG---FGDRITGSIQR

EPEC:  FNDQKKEHVNAVNLNEAREWLPALQVQSQIDGFESPFGLLELATVWLLSRGECQPLDS
      . . | . . | . . . | . . . | . . . | | | | | | | | | | | | | |
T. aquaticus: LKPKALDEAVLFLADYPKA-DEAATRAADWVKGFTPYGLELLATVHWAV-RHEGARWAS

EPEC:  VKEGLHQWFAGERWASRKLRLFDNNLQFAINRVMEFHC
      . . | . . | . . | . . | . . | . . | . . | . . | . . | . . |
T. aquaticus: LQKRL-----QAW-NPRKATFPKTHLQVALDALLKRG
  
```

**B**

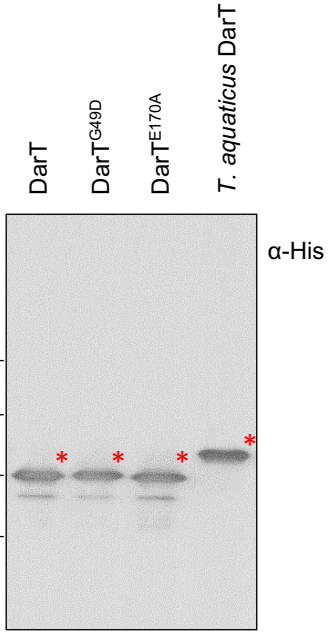

**C**

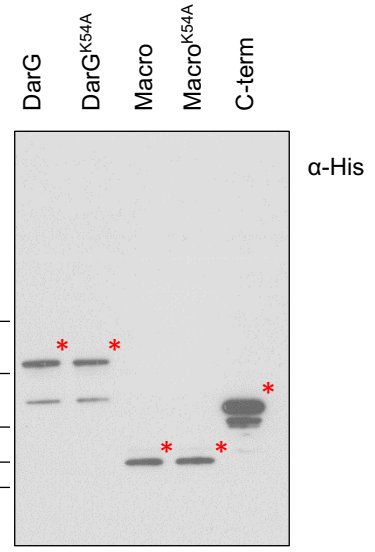

**Figure S1: Alignment of DarTG from *T. aquaticus* and EPEC, and the corresponding purified proteins after *in vitro* transcription/translation, related to Figures 1 and 2. (A) The amino acid similarity between *T. aquaticus* and EPEC DarT or DarG is 47% and 59%, respectively. Identical residues are shown with a line, similar residues are shown with a dot. The mutated glycine in EPEC DarT (G49D) is shown in purple while the mutated glutamic acid residues (DarT<sup>E160A</sup> in *T. aquaticus* and DarT<sup>E170A</sup> in EPEC) are marked in green. The macrodomain of DarG is highlighted in yellow while the C-terminal domain of DarG is showed in blue. The catalytic lysine residues of DarG (K80A in *T. aquaticus* and K54A in EPEC) are marked in red. Alignment was performed by Clustal O with JalView software. Levels of His-tagged (B) DarT and (C) DarG variants (indicated with red asterisks) obtained after *in vitro* transcription/translation determined by Western blot analysis using an anti-His antibody.**

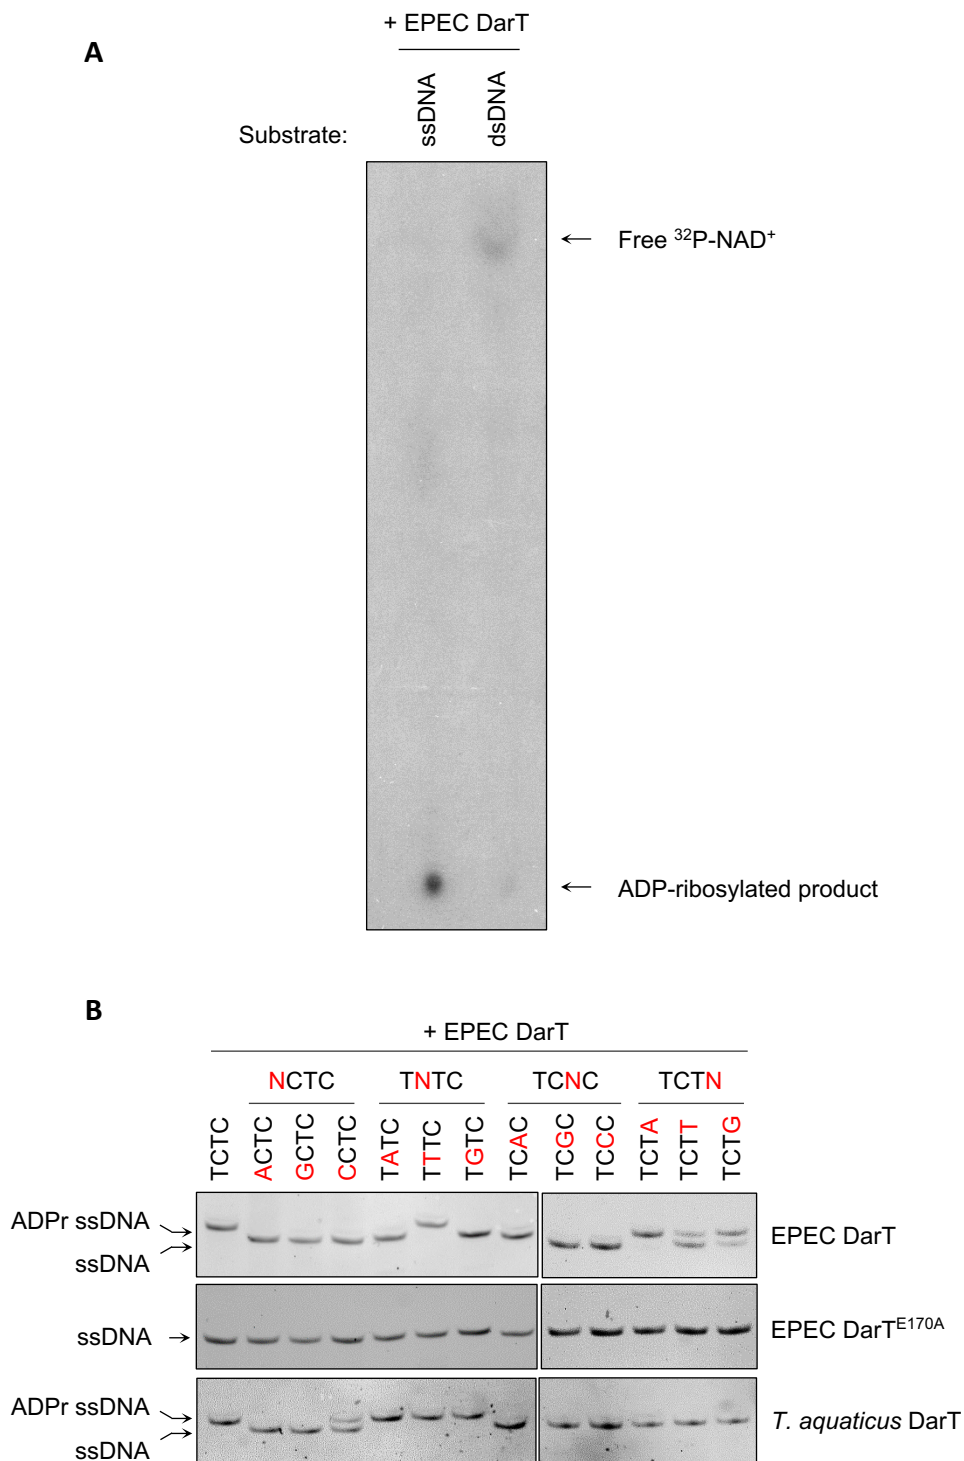

**Figure S2: EPEC DarT only ADP-ribosylates ssDNA, on a different DNA sequence than *T. aquaticus* DarT, related to Figure 1. (A)** ADP-ribosylation of 13-mer ssDNA or dsDNA oligonucleotides incubated with EPEC DarT with  $^{32}\text{P-NAD}^+$  and separated by thin-layer chromatography. Sequences of the oligonucleotides are provided in the Star methods. **(B)** ADP-ribosylation of 27-mer ssDNA oligonucleotides incubated with purified EPEC DarT or DarT<sup>E170A</sup> or *T. aquaticus* DarT. The region with different sequence is shown above each lane. ADPr ssDNA: ADP-ribosylated ssDNA. All oligonucleotides are listed in Table S1. n = 3, representative data from one experiment shown.

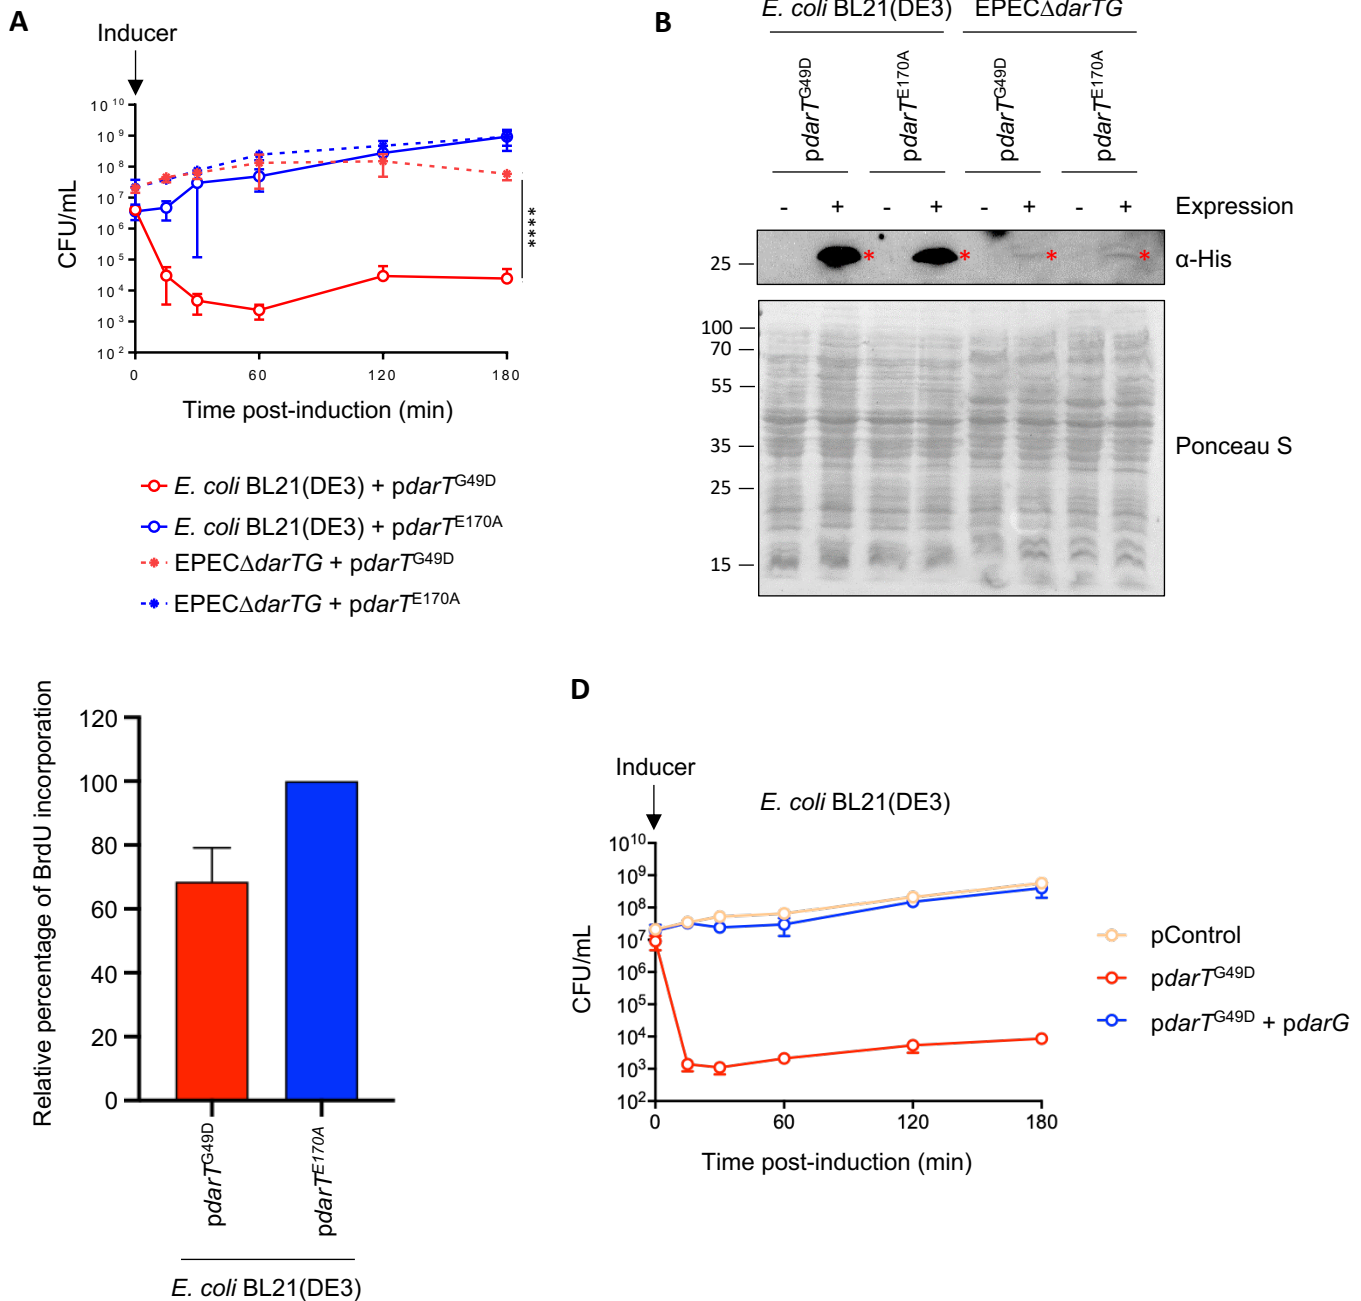

**Figure S3: Differential DarT<sup>G49D</sup>/DarT<sup>E170A</sup> toxicity and expression levels in *E. coli* BL21(DE3) and EPEC, where DarT<sup>G49D</sup> inhibits DNA replication in *E. coli* BL21(DE3) within 5 min of expression, related to Figures 1 and 5. (A) Viability of *E. coli* BL21(DE3) and EPEC $\Delta darTG$  following expression of  $darT^{G49D}$  or  $darT^{E170A}$ .  $n = 3 \pm$  s. d., \*\*\*\*  $p < 0.0001$  by two-way ANOVA between *E. coli* BL21(DE3) +  $pdarT^{G49D}$  and EPEC $\Delta darTG$  +  $pdarT^{G49D}$ . (B) Levels of His-tagged DarT<sup>G49D</sup> or DarT<sup>E170A</sup> (red asterisks) in cell lysates of *E. coli* BL21(DE3) and EPEC $\Delta darTG$  using an anti-His antibody. Expression of His-DarT<sup>G49D</sup>/His-DarT<sup>E170A</sup> is repressed by addition of 0.8% glucose or expressed by the addition 0.8% arabinose for 3 hrs. Ponceau S staining is shown as the loading control.  $n = 3$ , representative data from one experiment shown. (C) Relative values were obtained by calculating the ratio of the amount of BrdU incorporated following expression of  $darT^{G49D}$  vs.  $darT^{E170A}$ .  $n = 2 \pm$  s. d. (D) Viability of *E. coli* BL21(DE3) grown in M9 medium following expression of  $darT^{G49D}$  with or without DarG. pControl, empty plasmid;  $n = 2 \pm$  s. d.**



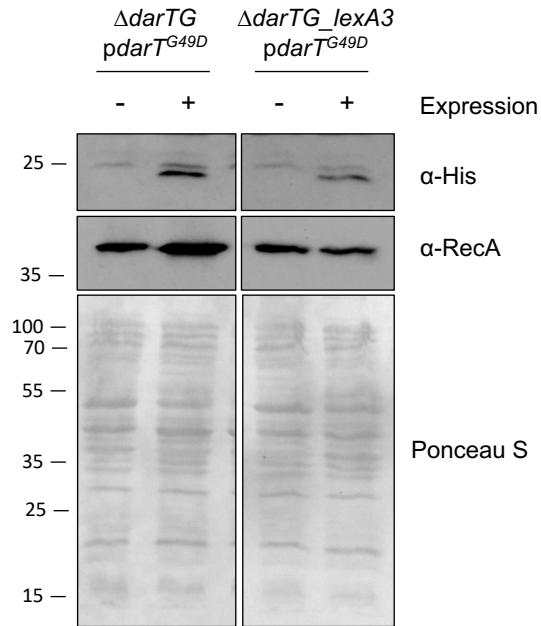

**Figure S4: Cellular RecA levels do not increase in the absence of an SOS response**, related to Figure 3. Western blot analysis of RecA expression levels in cell lysates of  $EPEC\Delta darTG$  and  $EPEC\Delta darTG\_lexA3$  using an anti-His (to detect levels of His tagged  $DarT^{G49D}$  or  $DarT^{E170A}$ ) and anti-RecA antibody after 3 hours of  $darT^{G49D}$  expression. Ponceau S staining is shown as the loading control. n = 3, representative data from one experiment shown.

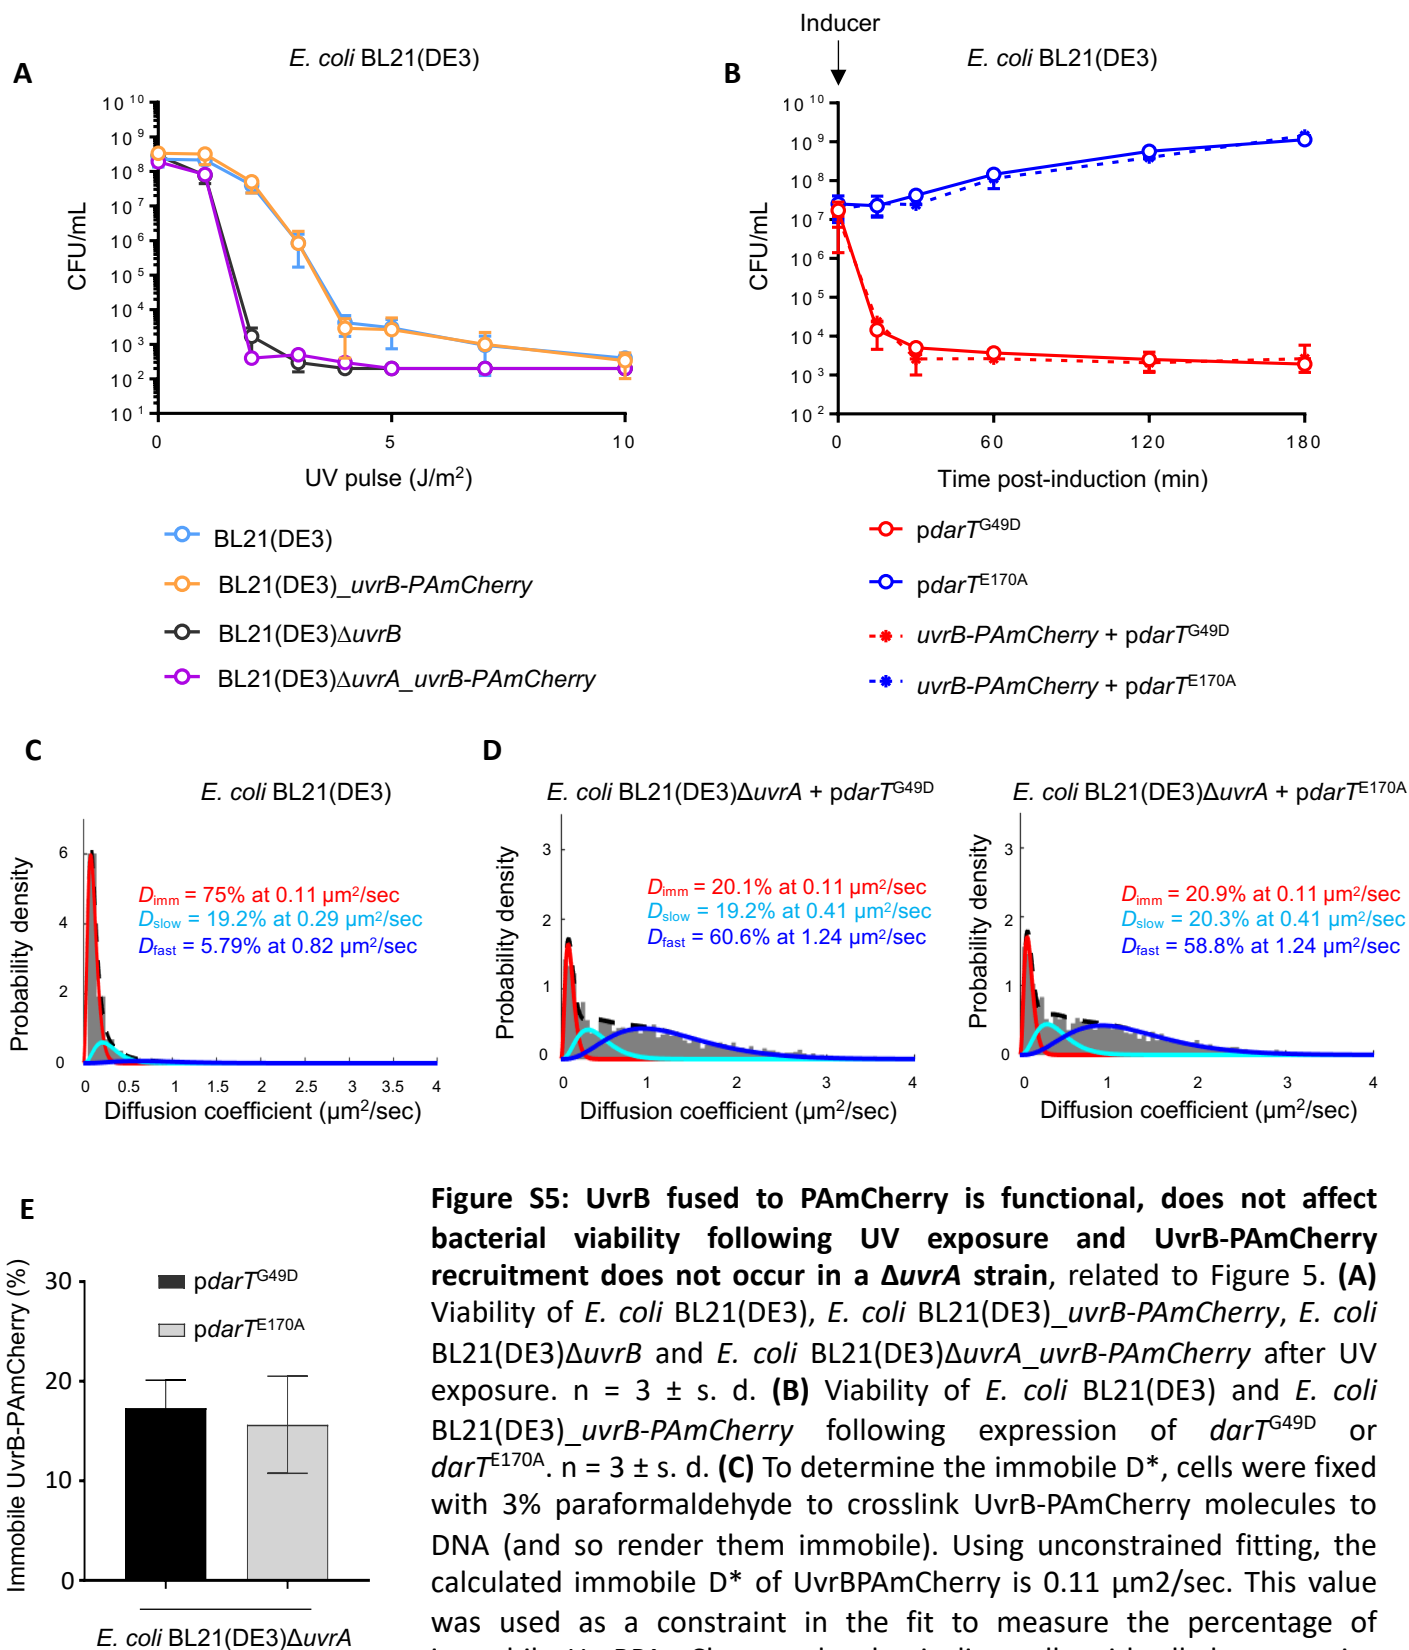

**Figure S5: UvrB fused to PAMCherry is functional, does not affect bacterial viability following UV exposure and UvrB-PAMCherry recruitment does not occur in a  $\Delta$ uvrA strain, related to Figure 5. (A)** Viability of *E. coli* BL21(DE3), *E. coli* BL21(DE3)<sub>uvrB-PAMCherry</sub>, *E. coli* BL21(DE3) $\Delta$ uvrB and *E. coli* BL21(DE3) $\Delta$ uvrA<sub>uvrB-PAMCherry</sub> after UV exposure.  $n = 3 \pm$  s. d. **(B)** Viability of *E. coli* BL21(DE3) and *E. coli* BL21(DE3)<sub>uvrB-PAMCherry</sub> following expression of *darT*<sup>G49D</sup> or *darT*<sup>E170A</sup>.  $n = 3 \pm$  s. d. **(C)** To determine the immobile  $D^*$ , cells were fixed with 3% paraformaldehyde to crosslink UvrB-PAMCherry molecules to DNA (and so render them immobile). Using unconstrained fitting, the calculated immobile  $D^*$  of UvrBPAMCherry is  $0.11 \mu$ m<sup>2</sup>/sec. This value was used as a constraint in the fit to measure the percentage of immobile UvrBPAMCherry molecules in live cells with all three species (immobile, slow, fast) present. **(D)** Determination of  $D^*$  values of UvrB-PAMCherry in *E. coli* BL21(DE3) $\Delta$ uvrA, fitted with a three constrained species model following 15 min expression of *darT*<sup>G49D</sup> or *darT*<sup>E170A</sup>. **(E)** Percentage of immobile UvrB-PAMCherry in *E. coli* BL21(DE3) $\Delta$ uvrA after 15 min expression of *darT*<sup>G49D</sup> or *darT*<sup>E170A</sup>.  $n = 2$  biological replicates  $\pm$  s. d.; total number of cells = 3,698; total number of tracks = 38,918.

**A**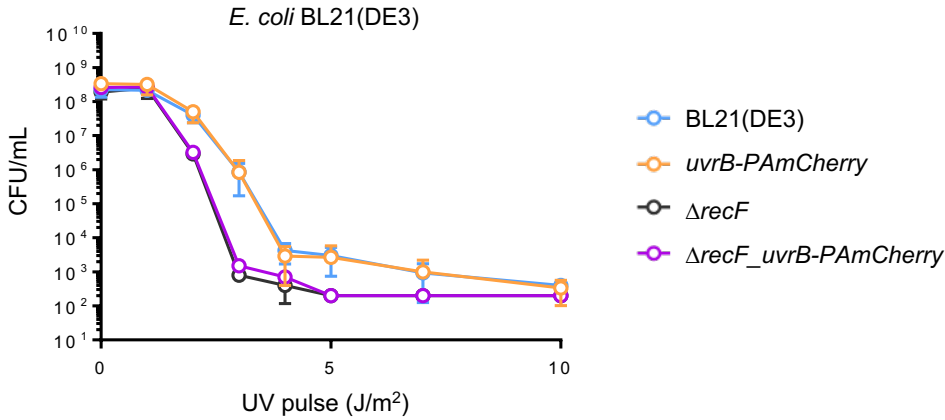**B**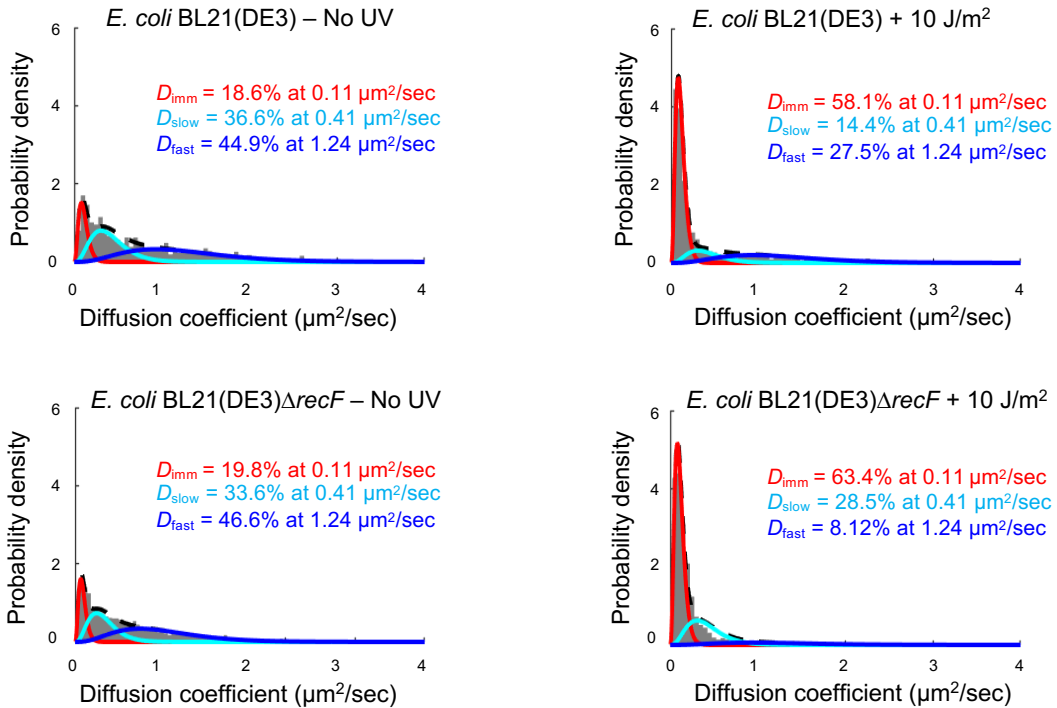**C**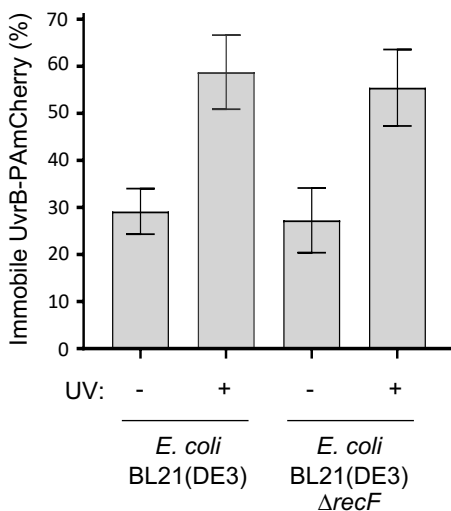

**Figure S6: NER is functional in a  $\Delta\text{recF}$  strain, related to Figure 6. (A)** Viability of BL21(DE3), BL21(DE3)*uvrB*-PAmCherry, BL21(DE3) $\Delta\text{recF}$  and BL21(DE3) $\Delta\text{recF}$ *uvrB*-PAmCherry after exposure to different UV doses.  $n = 3 \pm \text{s. d.}$  **(B)** Determination of  $D^*$  values of UvrB-PAmCherry in *E. coli* BL21(DE3) and BL21(DE3) $\Delta\text{recF}$ , fitted with a three species model (three constraints fit) with or without UV exposure. **(C)** Percentage of immobile UvrB-PAmCherry in *E. coli* BL21(DE3) and *E. coli* BL21(DE3) $\Delta\text{recF}$  after UV exposure.  $n = 3$  biological replicates  $\pm \text{s. d.}$ ; total number of cells = 12,976; total number of tracks = 126,225.

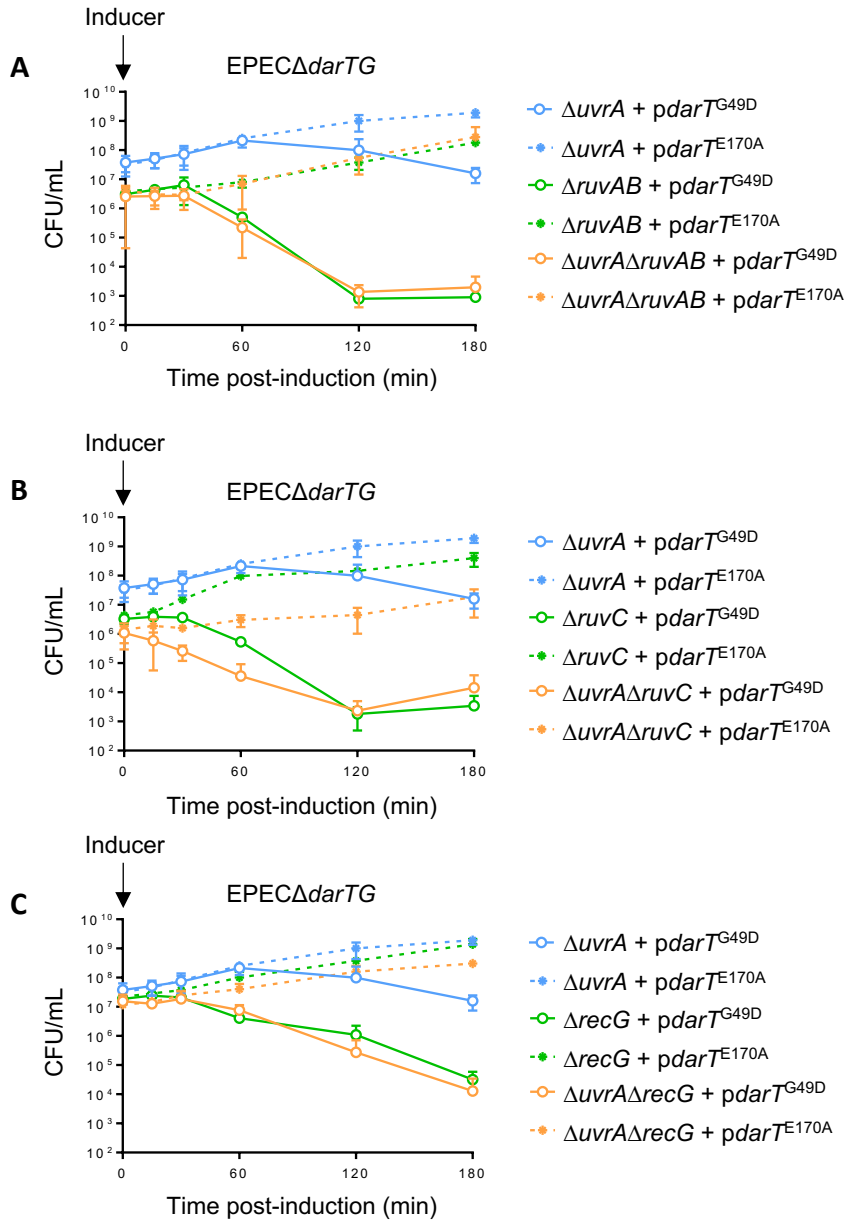

**Figure S7: Investigation of the sequentiality between RecF-mediated HR and NER pathways, related to Figure 6.** Viability of strains following expression of *darT*<sup>G49D</sup> or *darT*<sup>E170A</sup> in EPEC $\Delta$ darTG lacking RecF-mediated HR and/or NER **(A)** EPEC $\Delta$ darTG $\Delta$ ruvAB and EPEC $\Delta$ darTG $\Delta$ uvrA $\Delta$ ruvAB, **(B)** EPEC $\Delta$ darTG $\Delta$ ruvC and EPEC $\Delta$ darTG $\Delta$ uvrA $\Delta$ ruvC, **(C)** EPEC $\Delta$ darTG $\Delta$ recG and EPEC $\Delta$ darTG $\Delta$ uvrA $\Delta$ recG. n = 3  $\pm$  s. d. NS = p > 0.9999 by two-way ANOVA between EPEC $\Delta$ darTG $\Delta$ ruvAB/ $\Delta$ ruvC/ $\Delta$ recG + pdarT<sup>G49D</sup> and EPEC $\Delta$ darTG $\Delta$ uvrA $\Delta$ ruvAB/ $\Delta$ ruvC/ $\Delta$ recG + pdarT<sup>G49D</sup>.

| Name      | Sequence                                |
|-----------|-----------------------------------------|
| ADPr-EL1  | GAGCTGTACAAGTCAGAT <u>TCTC</u> GAGCTC   |
| ADPr-EL2  | GAGCTGTACAAGTCAGA <u>ACTC</u> GAGCTC    |
| ADPr-EL3  | GAGCTGTACAAGTCAGAG <u>CTC</u> GAGCTC    |
| ADPr-EL4  | GAGCTGTACAAGTCAGAC <u>CTC</u> GAGCTC    |
| ADPr-EL5  | GAGCTGTACAAGTCAGAT <u>TATC</u> GAGCTC   |
| ADPr-EL6  | GAGCTGTACAAGTCAGAT <u>TTTC</u> GAGCTC   |
| ADPr-EL7  | GAGCTGTACAAGTCAGAT <u>GTTC</u> GAGCTC   |
| ADPr-EL8  | GAGCTGTACAAGTCAGAT <u>CACG</u> GAGCTC   |
| ADPr-EL9  | GAGCTGTACAAGTCAGAT <u>CGCG</u> GAGCTC   |
| ADPr-EL10 | GAGCTGTACAAGTCAGAT <u>CCCC</u> GAGCTC   |
| ADPr-EL11 | GAGCTGTACAAGTCAGAT <u>CTA</u> GAGCTC    |
| ADPr-EL12 | GAGCTGTACAAGTCAGAT <u>CTT</u> GAGCTC    |
| ADPr-EL13 | GAGCTGTACAAGTCAGAT <u>CTGG</u> GAGCTC   |
| ADPr-EL14 | GAGCTGTACAAGTCAGT <u>TCTC</u> GAGCTC    |
| ADPr-EL15 | GAGCTGTACAAGTCAGG <u>TCTC</u> GAGCTC    |
| ADPr-EL16 | GAGCTGTACAAGTCAGCT <u>TCTC</u> GAGCTC   |
| ADPr-EL17 | GAGCTGTACAAGTCAGAT <u>TCTCT</u> AGCTC   |
| ADPr-EL18 | GAGCTGTACAAGTCAGAT <u>TCTC</u> GAGCTC   |
| ADPr-EL19 | GAGCTGTACAAGTCAGAT <u>TCTC</u> CAGCTC   |
| ADPr-EL20 | CTCGACATGATCAGTCG <u>TCTC</u> TCTCGAG   |
| ADPr-EL21 | CTCGACATGATCAGTCG <u>TTTCTC</u> TCTCGAG |

**Table S1**, related to STAR method: Oligonucleotides used for ADP-ribosylation assays

| Name  | Strain                                                                                    | Relevant genotype or description                                                                                                                                                                                                                                           | Reference               |
|-------|-------------------------------------------------------------------------------------------|----------------------------------------------------------------------------------------------------------------------------------------------------------------------------------------------------------------------------------------------------------------------------|-------------------------|
| EL131 | Dh5 $\alpha$                                                                              | <i>fhuA2</i> $\Delta$ ( <i>argF-lacZ</i> ) <i>U169</i> <i>phoA</i> <i>glnV44</i> $\Phi$ 80 $\Delta$ ( <i>lacZ</i> )M15<br><i>gyrA96</i> <i>recA1</i> <i>relA1</i> <i>endA1</i> <i>thi-1</i> <i>hsdR17</i>                                                                  | (Hanahan, 1983)         |
| EL183 | SM10                                                                                      | <i>thi</i> <i>thr</i> <i>leu</i> <i>tonA</i> <i>lacy</i> <i>supE</i> <i>recA::RP4-2-Tc::Mu</i> $\lambda$ pir; <i>kan</i> <sup>R</sup>                                                                                                                                      | (Simon, 1983)           |
| EL615 | <i>E. coli</i> $\lambda$ pir                                                              | $\lambda$ pir $\Delta$ <i>dapA</i> $\Delta$ <i>recA</i> ; <i>apra</i> <sup>R</sup> <i>erm</i> <sup>R</sup> <i>zeo</i> <sup>R</sup>                                                                                                                                         | (Herrero et al., 1990)  |
| EL270 | BTH101                                                                                    | <i>F-</i> <i>cya-99</i> <i>araD139</i> <i>galE15</i> <i>galk16</i> <i>rpsL1</i> ( <i>Strr</i> ) <i>hsdR2</i> <i>mcrA1</i> <i>mcrB1</i>                                                                                                                                     | (Karimova et al., 2000) |
| EL67  | BL21(DE3)                                                                                 | <i>E. coli</i> expression strain: <i>F</i> <sup>-</sup> <i>ompT</i> <i>hsdS</i> ( <i>r<sub>B</sub></i> <sup>-</sup> <i>m<sub>B</sub></i> <sup>-</sup> ) <i>dcm</i> <sup>+</sup> <i>Tet</i> <sup>r</sup> <i>gal</i> $\lambda$ (DE3) <i>endA</i> [ <i>argU</i> <i>proL</i> ] | Stratagene              |
| EL572 | BL21(DE3) $\Delta$ <i>recF</i>                                                            | BL21(DE3) $\Delta$ <i>recF</i>                                                                                                                                                                                                                                             | This study              |
| EL646 | BL21(DE3) $\Delta$ <i>uvrA</i> <i>uvrB</i> - <i>PAmCherry</i>                             | BL21(DE3) $\Delta$ <i>uvrA</i> with chromosomal <i>uvrB</i> fused to <i>PAmCherry</i> ; <i>Kan</i> <sup>R</sup>                                                                                                                                                            | This study              |
| EL653 | BL21(DE3) $\Delta$ <i>uvrB</i>                                                            | BL21(DE3) $\Delta$ <i>uvrB</i>                                                                                                                                                                                                                                             | This study              |
| EL325 | BL21(DE3) <i>uvrB</i> - <i>PAmCherry</i>                                                  | BL21(DE3) with chromosomal <i>uvrB</i> fused to <i>PAmCherry</i> ; <i>Kan</i> <sup>R</sup>                                                                                                                                                                                 | This study              |
| EL614 | BL21(DE3) $\Delta$ <i>recF</i> <i>uvrB</i> - <i>PAmCherry</i>                             | BL21(DE3) $\Delta$ <i>recF</i> with chromosomal <i>uvrB</i> fused to <i>PAmCherry</i> ; <i>kan</i> <sup>R</sup>                                                                                                                                                            | This study              |
| EL1   | EPEC                                                                                      | Enteropathogenic <i>E. coli</i> isolate O127:H6 str. E2348/69; <i>Str</i> <sup>R</sup>                                                                                                                                                                                     | (Knutton et al., 1987)  |
| EL2   | EPEC $\Delta$ <i>darTG</i>                                                                | EPEC E2348/69 $\Delta$ <i>darTG</i> ; <i>Str</i> <sup>R</sup>                                                                                                                                                                                                              | This study              |
| EL268 | EPEC $\Delta$ <i>darTG</i> $\Delta$ <i>dinB</i>                                           | EPEC E2348/69 $\Delta$ <i>darTG</i> $\Delta$ <i>dinB</i> ; <i>Str</i> <sup>R</sup>                                                                                                                                                                                         | This study              |
| EL326 | EPEC $\Delta$ <i>darTG</i> $\Delta$ <i>dinB</i> $\Delta$ <i>polB</i> $\Delta$ <i>umuD</i> | EPEC E2348/69 $\Delta$ <i>darTG</i> $\Delta$ <i>dinB</i> $\Delta$ <i>polB</i> $\Delta$ <i>umuD</i> ; <i>Str</i> <sup>R</sup>                                                                                                                                               | This study              |
| EL377 | EPEC $\Delta$ <i>darTG</i> $\Delta$ <i>fpg</i>                                            | EPEC E2348/69 $\Delta$ <i>darTG</i> $\Delta$ <i>fpg</i> ; <i>Str</i> <sup>R</sup>                                                                                                                                                                                          | This study              |
| EL415 | EPEC $\Delta$ <i>darTG</i> <i>lexA3</i>                                                   | EPEC E2348/69 containing a point mutation (G85D) in chromosomal <i>lexA</i> ; <i>Str</i> <sup>R</sup>                                                                                                                                                                      | This study              |
| EL226 | EPEC $\Delta$ <i>darTG</i> $\Delta$ <i>mutH</i>                                           | EPEC E2348/69 $\Delta$ <i>darTG</i> $\Delta$ <i>mutH</i> ; <i>Str</i> <sup>R</sup>                                                                                                                                                                                         | This study              |
| EL228 | EPEC $\Delta$ <i>darTG</i> $\Delta$ <i>mutS</i>                                           | EPEC E2348/69 $\Delta$ <i>darTG</i> $\Delta$ <i>mutS</i> ; <i>Str</i> <sup>R</sup>                                                                                                                                                                                         | This study              |
| EL378 | EPEC $\Delta$ <i>darTG</i> $\Delta$ <i>nei</i>                                            | EPEC E2348/69 $\Delta$ <i>darTG</i> $\Delta$ <i>nei</i> ; <i>Str</i> <sup>R</sup>                                                                                                                                                                                          | This study              |
| EL379 | EPEC $\Delta$ <i>darTG</i> $\Delta$ <i>nfo</i>                                            | EPEC E2348/69 $\Delta$ <i>darTG</i> $\Delta$ <i>nfo</i> ; <i>Str</i> <sup>R</sup>                                                                                                                                                                                          | This study              |
| EL269 | EPEC $\Delta$ <i>darTG</i> $\Delta$ <i>polB</i>                                           | EPEC E2348/69 $\Delta$ <i>darTG</i> $\Delta$ <i>polB</i> ; <i>Str</i> <sup>R</sup>                                                                                                                                                                                         | This study              |
| EL203 | EPEC $\Delta$ <i>darTG</i> $\Delta$ <i>recA</i>                                           | EPEC E2348/69 $\Delta$ <i>darTG</i> $\Delta$ <i>recA</i> ; <i>Str</i> <sup>R</sup>                                                                                                                                                                                         | This study              |
| EL588 | EPEC $\Delta$ <i>darTG</i> $\Delta$ <i>recD</i>                                           | EPEC E2348/69 $\Delta$ <i>darTG</i> $\Delta$ <i>recD</i> ; <i>Str</i> <sup>R</sup>                                                                                                                                                                                         | This study              |
| EL526 | EPEC $\Delta$ <i>darTG</i> $\Delta$ <i>recF</i>                                           | EPEC E2348/69 $\Delta$ <i>darTG</i> $\Delta$ <i>recF</i> ; <i>Str</i> <sup>R</sup>                                                                                                                                                                                         | This study              |
| EL527 | EPEC $\Delta$ <i>darTG</i> $\Delta$ <i>recG</i>                                           | EPEC E2348/69 $\Delta$ <i>darTG</i> $\Delta$ <i>recG</i> ; <i>Str</i> <sup>R</sup>                                                                                                                                                                                         | This study              |
| EL468 | EPEC $\Delta$ <i>darTG</i> $\Delta$ <i>ruvAB</i>                                          | EPEC E2348/69 $\Delta$ <i>darTG</i> $\Delta$ <i>ruvAB</i> ; <i>Str</i> <sup>R</sup>                                                                                                                                                                                        | This study              |
| EL528 | EPEC $\Delta$ <i>darTG</i> $\Delta$ <i>ruvC</i>                                           | EPEC E2348/69 $\Delta$ <i>darTG</i> $\Delta$ <i>ruvC</i> ; <i>Str</i> <sup>R</sup>                                                                                                                                                                                         | This study              |
| EL307 | EPEC $\Delta$ <i>darTG</i> $\Delta$ <i>umuD</i>                                           | EPEC E2348/69 $\Delta$ <i>darTG</i> $\Delta$ <i>umuD</i> ; <i>Str</i> <sup>R</sup>                                                                                                                                                                                         | This study              |
| EL224 | EPEC $\Delta$ <i>darTG</i> $\Delta$ <i>uvrA</i>                                           | EPEC E2348/69 $\Delta$ <i>darTG</i> $\Delta$ <i>uvrA</i> ; <i>Str</i> <sup>R</sup>                                                                                                                                                                                         | This study              |
| EL530 | EPEC $\Delta$ <i>darTG</i> $\Delta$ <i>uvrA</i> $\Delta$ <i>recF</i>                      | EPEC E2348/69 $\Delta$ <i>darTG</i> $\Delta$ <i>uvrA</i> $\Delta$ <i>recF</i> ; <i>Str</i> <sup>R</sup>                                                                                                                                                                    | This study              |
| EL531 | EPEC $\Delta$ <i>darTG</i> $\Delta$ <i>uvrA</i> $\Delta$ <i>recG</i>                      | EPEC E2348/69 $\Delta$ <i>darTG</i> $\Delta$ <i>uvrA</i> $\Delta$ <i>recG</i> ; <i>Str</i> <sup>R</sup>                                                                                                                                                                    | This study              |
| EL533 | EPEC $\Delta$ <i>darTG</i> $\Delta$ <i>uvrA</i> $\Delta$ <i>ruvAB</i>                     | EPEC E2348/69 $\Delta$ <i>darTG</i> $\Delta$ <i>uvrA</i> $\Delta$ <i>ruvAB</i> ; <i>Str</i> <sup>R</sup>                                                                                                                                                                   | This study              |
| EL532 | EPEC $\Delta$ <i>darTG</i> $\Delta$ <i>uvrA</i> $\Delta$ <i>ruvC</i>                      | EPEC E2348/69 $\Delta$ <i>darTG</i> $\Delta$ <i>uvrA</i> $\Delta$ <i>ruvC</i> ; <i>Str</i> <sup>R</sup>                                                                                                                                                                    | This study              |
| EL412 | EPEC $\Delta$ <i>darTG</i> $\Delta$ <i>xth</i>                                            | EPEC E2348/69 $\Delta$ <i>darTG</i> $\Delta$ <i>xth</i> ; <i>Str</i> <sup>R</sup>                                                                                                                                                                                          | This study              |

**Table S2**, related to STAR method : Strains used in this study
